# Supplementary material
Source: publisher figshare collection journal article supplement (https://asha.figshare.com/articles/dataset/_/19302275)
Supplement: Supplementary file 1 [file 1]

**Supplemental Material S2.** Acoustic characteristics of the four Mandarin tones produced in the phonated mode and results of one-way ANOVAs conducted to compare the four tones on each acoustic cue (the  $p$ -value was corrected for multiple comparisons:  $.05/6 = .008$ ).

| Tone               | $f_0$ mean (Hz) | $f_0$ SD     | Duration (ms)  | Intensity (dB) | F1 (Hz)         | F2 (Hz)          |
|--------------------|-----------------|--------------|----------------|----------------|-----------------|------------------|
| T1 (SD)            | 194.11 (8.75)   | 3.53 (2.39)  | 516.95 (64.93) | 72.06 (3.46)   | 586.05 (360.61) | 1655.66 (842.74) |
| T2 (SD)            | 154.83 (11.06)  | 23.03 (4.01) | 470.17 (54.68) | 71.44 (2.70)   | 577.33 (369.32) | 1664.7 (828.89)  |
| T3 (SD)            | 128.04 (6.02)   | 15.59 (3.21) | 662.97 (60.79) | 68.01 (1.85)   | 574.02 (375.87) | 1621.73 (875.03) |
| T4 (SD)            | 173.68 (8.2)    | 34.58 (5.93) | 355.29 (68.84) | 72.81 (2.98)   | 613 (354.73)    | 1677.88 (834.75) |
| $p$ value          | $p < .001$      | $p < .001$   | $p < .001$     | $p = .005$     | $n.s.$          | $n.s.$           |
| $\eta^2_{partial}$ | .90             | .89          | .78            | .33            | .02             | .01              |
