# Supplementary material
Source: publisher figshare collection journal article supplement (https://asha.figshare.com/articles/dataset/_/19302275)

**Supplemental Material S15.** The relationship between the acoustic cues and whispered intonation identification.

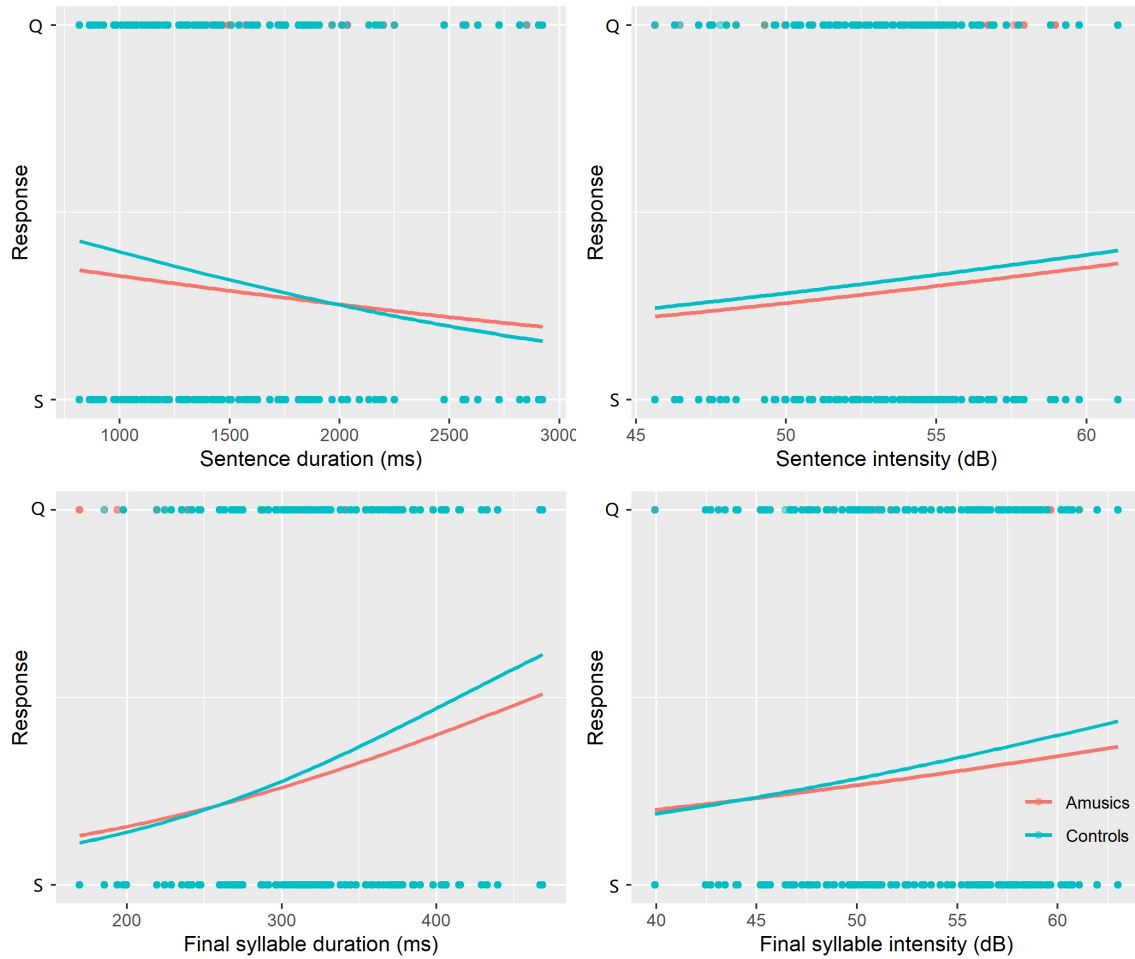

Supplement: Supplementary file 2 [file 1]
