# Supplementary material
Source: publisher figshare collection journal article supplement (https://asha.figshare.com/articles/dataset/_/19302275)
Supplement: Supplementary file 3 [file 1]

**Supplemental Material S3.** Acoustic characteristics of the four Mandarin tones produced in the whispered mode and results of one-way ANOVAs conducted to compare the four tones on each acoustic cue (the  $p$ -value was corrected for multiple comparisons:  $.05/4 = .0125$ ).

| Tone                      | Duration (ms)   | Intensity (dB) | F1 (Hz)         | F2 (Hz)          |
|---------------------------|-----------------|----------------|-----------------|------------------|
| T1 ( <i>SD</i> )          | 515.94 (42.05)  | 54.02 (5.35)   | 874.46 (259.63) | 1867.19 (621.35) |
| T2 ( <i>SD</i> )          | 472.93 (44.75)  | 54.08 (5.23)   | 833.65 (290.29) | 1826.28 (632.03) |
| T3 ( <i>SD</i> )          | 629.10 (63.24)  | 51.74 (5.48)   | 809.94 (290.36) | 1789.99(666.22)  |
| T4 ( <i>SD</i> )          | 365. 81 (58.34) | 55.81 (4.17)   | 838.73 (276.04) | 1872.67 (602.65) |
| $p$ value                 | $p < .001$      | <i>n.s.</i>    | <i>n.s.</i>     | <i>n.s.</i>      |
| $\eta^2_{\text{partial}}$ | .78             | .08            | .08             | .03              |
