# Supplementary material
Source: publisher figshare collection journal article supplement (https://asha.figshare.com/articles/dataset/_/19302275)

**Supplemental Material S13.** The relationship between the acoustic cues and phonated intonation identification.

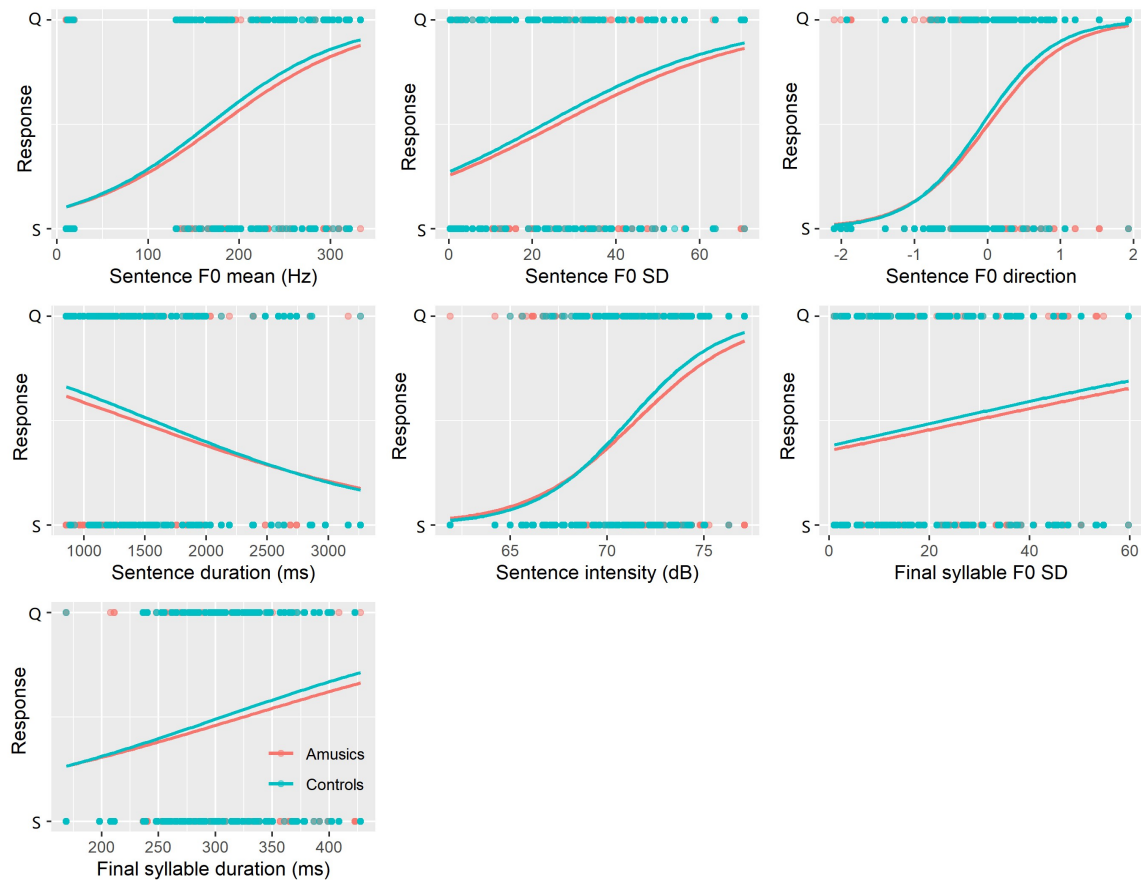

Supplement: Supplementary file 4 [file 1]
