# Supplementary material
Source: publisher figshare collection journal article supplement (https://asha.figshare.com/articles/dataset/_/19302275)
Supplement: Supplementary file 5 [file 1]

**Supplemental Material S9.** Confusion matrix of intonation identification.

| Phonated mode | Heard Original | Question (%) | Statement (%) | Whispered mode | Question (%) | Statement (%) |
|---------------|----------------|--------------|---------------|----------------|--------------|---------------|
| Controls      | Question       | <b>96.89</b> | 3.11          | Controls       | <b>51.21</b> | 48.79         |
|               | Statement      | 1.95         | <b>98.05</b>  |                | 12.42        | <b>87.58</b>  |
| Amusics       | Question       | <b>89.63</b> | 10.37         | Amusics        | <b>41.26</b> | 58.74         |
|               | Statement      | 3.47         | <b>96.53</b>  |                | 16.58        | <b>83.42</b>  |
