# Supplementary material
Source: publisher figshare collection journal article supplement (https://asha.figshare.com/articles/dataset/_/19302275)
Supplement: Supplementary file 6 [file 1]

**Supplemental Material S8.** Confusion matrix of tone identification in the whispered mode.

| Group    | Heard<br>Original | T1 (%)       | T2 (%)       | T3 (%)       | T4 (%)       |
|----------|-------------------|--------------|--------------|--------------|--------------|
|          |                   |              |              |              |              |
| Controls | T1                | <b>46.00</b> | 12.38        | 16.96        | 24.66        |
|          | T2                | 12.86        | <b>48.64</b> | 29.53        | 8.97         |
|          | T3                | 1.27         | 7.50         | <b>90.64</b> | 0.58         |
|          | T4                | 14.23        | 4.58         | 5.46         | <b>75.73</b> |
| Amusics  | T1                | <b>43.96</b> | 21.05        | 18.42        | 16.57        |
|          | T2                | 17.64        | <b>41.13</b> | 32.94        | 8.28         |
|          | T3                | 4.58         | 8.28         | <b>85.09</b> | 2.05         |
|          | T4                | 18.23        | 9.36         | 8.87         | <b>63.55</b> |

*Note.* For each tonal category of the stimuli, the target tone response was in bold, and the tone response receiving the highest confusion rate was italicized.
