# Supplementary material
Source: publisher figshare collection journal article supplement (https://asha.figshare.com/articles/dataset/_/19302275)

**Supplemental Material S11.** The relationship with the MBEA scores and tone and intonation identification in both phonation modes.

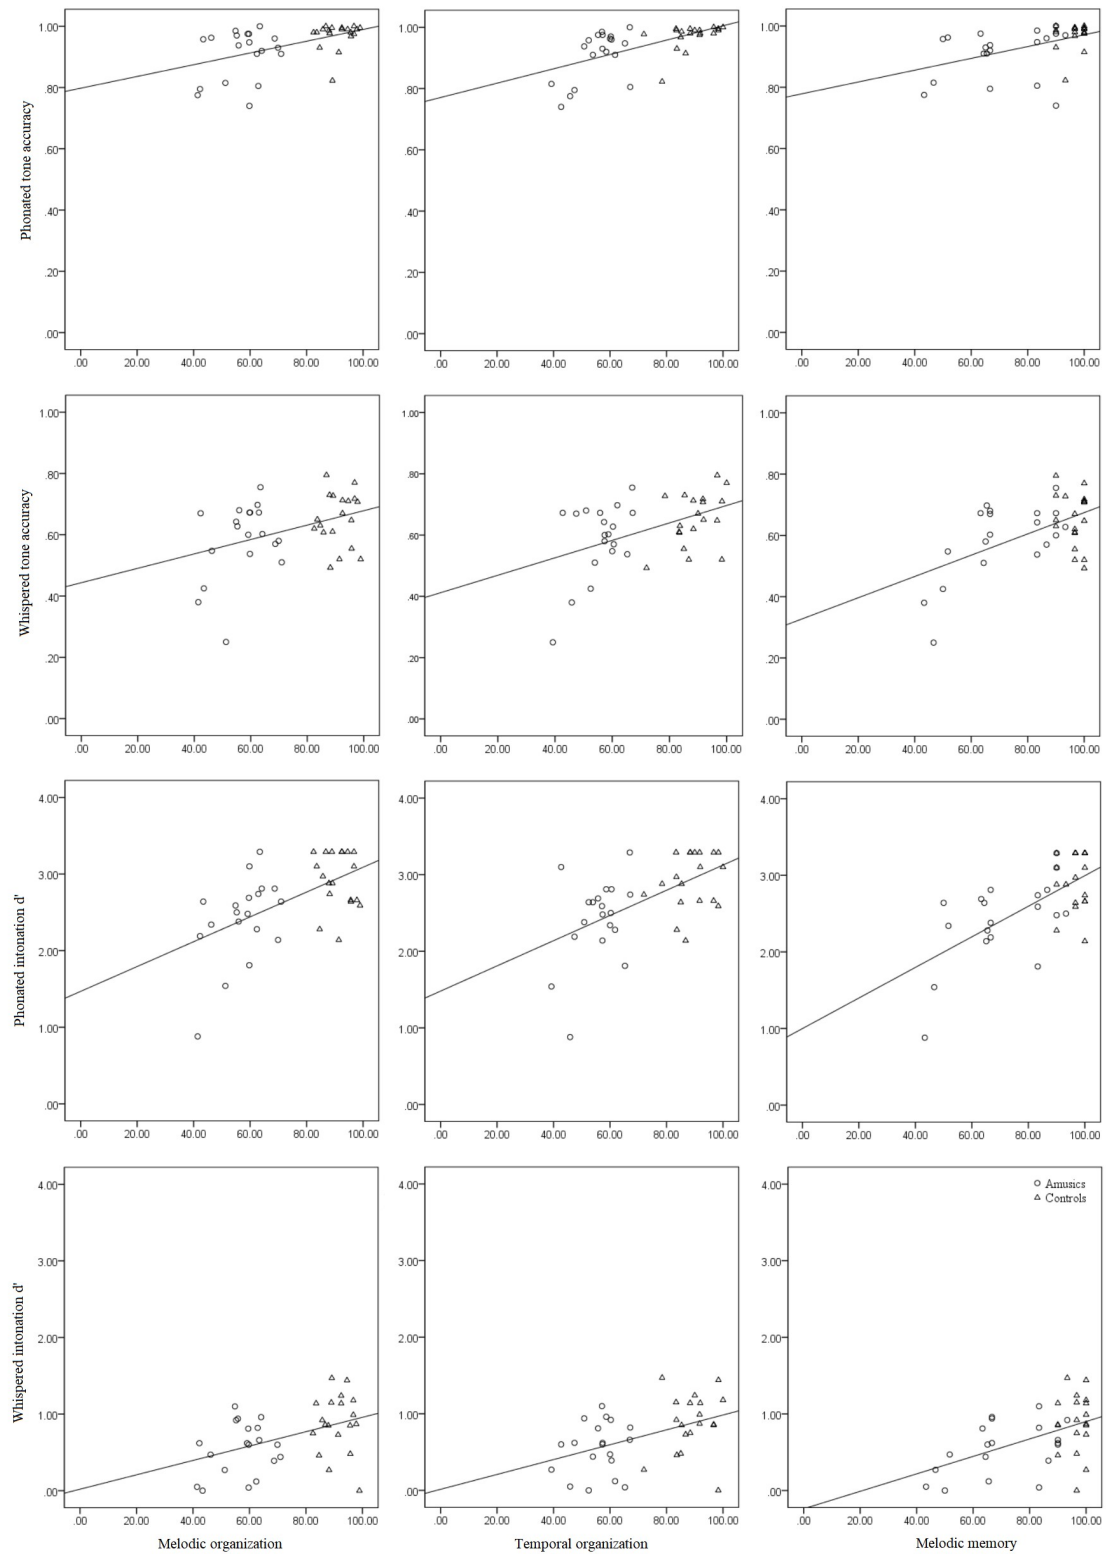

Supplement: Supplementary file 7 [file 1]
