# Supplementary material
Source: publisher figshare collection journal article supplement (https://asha.figshare.com/articles/dataset/_/19302275)
Supplement: Supplementary file 8 [file 1]

**Supplemental Material S5.** Acoustic characteristics of statements and questions in the whispered mode and results of *t*-tests conducted to compare statement and question on each acoustic cue (the *p*-value was corrected for multiple comparisons:  $.05/4 = .0125$ ).

| Intonation              | Sentence         |                     | Final Syllable |                     |
|-------------------------|------------------|---------------------|----------------|---------------------|
|                         | Duration (ms)    | Mean Intensity (dB) | Duration (ms)  | Mean Intensity (dB) |
| Statement ( <i>SD</i> ) | 1645.67 (482.22) | 53.46 (2.49)        | 305.11 (61.13) | 52.29 (5.17)        |
| Question ( <i>SD</i> )  | 1453.95 (470.21) | 53.25 (2.09)        | 330.95 (42.82) | 53.54 (4.00)        |
| <i>p</i> value          | $p < .001$       | <i>n.s.</i>         | $p = .001$     | <i>n.s.</i>         |
| Cohen’s <i>d</i>        | 0.40             | 0.10                | 0.49           | 0.27                |
