# Supplementary material
Source: publisher figshare collection journal article supplement (https://asha.figshare.com/articles/dataset/_/19302275)
Supplement: Supplementary file 9 [file 1]

**Supplemental Material S7.** Confusion matrix of tone identification in the phonated mode.

| Group    | Heard<br>Original | T1 (%)       | T2 (%)       | T3 (%)       | T4 (%)       |
|----------|-------------------|--------------|--------------|--------------|--------------|
|          |                   |              |              |              |              |
| Controls | T1                | <b>96.59</b> | 2.92         | 0.19         | 0.29         |
|          | T2                | 2.14         | <b>97.17</b> | 0.29         | 0.39         |
|          | T3                | 0.39         | 2.34         | <b>96.39</b> | 0.68         |
|          | T4                | 0.29         | 0.78         | 0.29         | <b>98.64</b> |
| Amusics  | T1                | <b>93.08</b> | 4.87         | 1.36         | 0.58         |
|          | T2                | 6.63         | <b>82.55</b> | 9.16         | 1.56         |
|          | T3                | 1.75         | 4.39         | <b>92.98</b> | 0.88         |
|          | T4                | 1.56         | 1.85         | 1.27         | <b>95.32</b> |

*Note.* For each tonal category of the stimuli, the target tone response was in bold, and the tone response receiving the highest confusion rate was italicized.
