# Supplementary material
Source: publisher figshare collection journal article supplement (https://asha.figshare.com/articles/dataset/_/19302275)
Supplement: Supplementary file 10 [file 1]

**Supplemental Material S10.** Results of simultaneous linear regression models with the MBEA scores as predictors on tone and intonation identification.

| Phonation mode | MBEA predictors      |                       |                | R <sup>2</sup> of the model |
|----------------|----------------------|-----------------------|----------------|-----------------------------|
|                | Melodic organization | Temporal organization | Melodic memory |                             |
| Tone           |                      |                       |                |                             |
| Phonated mode  | -0.38 (7.22)         | 0.89* (6.2)           | 0.09 (3.06)    | 0.62**                      |
| Whispered mode | -0.61                | 0.55                  | 0.60*          | 0.59**                      |
| Intonation     |                      |                       |                |                             |
| Phonated mode  | -0.07                | 0.21                  | 0.55*          | 0.66***                     |
| Whispered mode | -0.08                | 0.21                  | 0.40           | 0.51*                       |

*Note.* The values represent standardized regression coefficients for the predictors retained in the model. The values in parentheses present VIF. \* $p < .05$ . \*\* $p < .01$ . \*\*\* $p < .001$ .
