# Supplementary material
Source: publisher figshare collection journal article supplement (https://asha.figshare.com/articles/dataset/_/19302275)
Supplement: Supplementary file 11 [file 1]

**Supplemental Material S4.** Acoustic characteristics of statements and questions in the phonated mode and results of *t*-tests conducted to compare statement and question on each acoustic cue (the *p*-value was corrected for multiple comparisons:  $.05/9 = .005$ ).

| Sentence         |                 |               |                     |                  |                |
|------------------|-----------------|---------------|---------------------|------------------|----------------|
| Intonation       | $f_0$ mean (Hz) | $f_0$ SD      | $f_0$ direction     | Duration (ms)    | Intensity (dB) |
| Statement (SD)   | 163.28 (28.16)  | 22.34 (10.81) | -0.42 (0.40)        | 1745.91 (541.99) | 69.46 (1.41)   |
| Question (SD)    | 213.36 (26.77)  | 29.27 (14.96) | 0.22 (0.60)         | 1463.45 (446.62) | 72.41 (1.12)   |
| <i>p</i> value   | $p < .001$      | $p < .001$    | $p < .001$          | $p < .001$       | $p < .001$     |
| Cohen's <i>d</i> | 1.82            | 0.53          | 1.26                | 0.57             | 2.32           |
| Final syllable   |                 |               |                     |                  |                |
| Intonation       | $f_0$ mean (Hz) | $f_0$ SD      | Duration (ms)       | Intensity (dB)   |                |
| Statement (SD)   | 152.32 (36.02)  | 19.33 (12.31) | 292.69 (47.06)      | 67.05 (2.16)     |                |
| Question (SD)    | 222.48 (46.96)  | 24.12 (11.48) | 313.13 (38)         | 72.51 (2.19)     |                |
| <i>p</i> value   | $p < .001$      | n.s.          | n.s. ( $p = .012$ ) | $p < .001$       |                |
| Cohen's <i>d</i> | 1.68            | 0.4           | 0.48                | 2.51             |                |
