# Supplementary material
Source: publisher figshare collection journal article supplement (https://asha.figshare.com/articles/dataset/_/19302275)
Supplement: Supplementary file 12 [file 1]

**Supplemental Material S1.** A list of syllables and sentences for production and perception experiments.

| Syllables      |                                                                                             |               |                  |               |                |                                                                                                               |             |                |                |
|----------------|---------------------------------------------------------------------------------------------|---------------|------------------|---------------|----------------|---------------------------------------------------------------------------------------------------------------|-------------|----------------|----------------|
| Tone           | /ta/                                                                                        | /ti/          | /tu/             | /pa/          | /pi/           | /tʃu/                                                                                                         | /a/         | /i/            | /u/            |
| 1              | 搭<br>(build)                                                                                | 低<br>(low)    | 督<br>(supervise) | 八<br>(eight)  | 逼<br>(force)   | 猪<br>(pig)                                                                                                    | 啊<br>(oh)   | 一<br>(one)     | 屋<br>(house)   |
| 2              | 答<br>(answer)                                                                               | 敌<br>(enemy)  | 毒<br>(poison)    | 拔<br>(pull)   | 鼻<br>(nose)    | 竹<br>(bamboo)                                                                                                 | 啊<br>(eh)   | 遗<br>(pity)    | 无<br>(nothing) |
| 3              | 打<br>(fight)                                                                                | 底<br>(bottom) | 赌<br>(bet)       | 把<br>(handle) | 笔<br>(pen)     | 主<br>(lord)                                                                                                   | 啊<br>(what) | 已<br>(already) | 五<br>(five)    |
| 4              | 大<br>(big)                                                                                  | 地<br>(land)   | 肚<br>(belly)     | 爸<br>(father) | 币<br>(coin)    | 祝<br>(wish)                                                                                                   | 啊<br>(ah)   | 易<br>(easy)    | 误<br>(error)   |
| Sentences      |                                                                                             |               |                  |               |                |                                                                                                               |             |                |                |
| 4<br>syllables | 张薇开车。/?<br>/tʃaŋ55 uei55 kʰai55 tʂʰə55/<br>(Zhang Wei drives the car./?)                    |               |                  |               | 5<br>syllables | 高兵喝鸡汤。/?<br>/kau55 piəŋ55 xə55 tɕi55 tʰaŋ55/<br>(Gao Bing drinks chicken soup./?)                             |             |                |                |
|                | 王梅划船。/?<br>/uaŋ35 mei35 xua35 tʂʰuan35/<br>(Wang Mei boats./?)                              |               |                  |               |                | 罗婷学轮滑。/?<br>/luo35 tʰiəŋ35 ɕyɛ35 luən35 xua35/<br>(Luo Ting learns skating./?)                                |             |                |                |
|                | 李敏点火。/?<br>/li214 miən214 diən214 huo214/<br>(Li Min makes a fire./?)                       |               |                  |               |                | 李伟买雨伞。/?<br>/li214 uei214 mai214 y214 san214/<br>(Li Wei buys an umbrella./?)                                 |             |                |                |
|                | 叶亮睡觉。/?<br>/iɛ51 liɑŋ51 ʂuei51 tɕiau51/<br>(Ye Liang sleeps./?)                             |               |                  |               |                | 赵志看电视。/?<br>/tʂau51 tʂɿ51 kʰan51 tiən51 ʂɿ51/<br>(Zhao Zhi watches TV./?)                                     |             |                |                |
|                | 李刚讲课。/?<br>/li214 kaŋ55 tɕiaŋ214 kʰə51/<br>(Li Gang gives a lesson./?)                      |               |                  |               |                | 李刚交水费。/?<br>/li214 kaŋ55 tɕiau55 ʂuei214 fei51/<br>(Li Gang pays water fee./?)                                |             |                |                |
| 6<br>syllables | 张薇担心肖英。<br>/tʃaŋ55 uei55 tan55 ɕiən55 ɕiau iəŋ55/<br>(Zhang Wei worries about Xiao Ying./?) |               |                  |               | 7<br>syllables | 高兵今天喝鸡汤。/?<br>/kau55 piəŋ55 tɕiən55 tʰiən55 xə55 tɕi55<br>tʰaŋ55/<br>(Gao Bing drinks chicken soup today./? ) |             |                |                |

|                 |                                                                                                                                                         |  |                                                                                                                 |
|-----------------|---------------------------------------------------------------------------------------------------------------------------------------------------------|--|-----------------------------------------------------------------------------------------------------------------|
|                 | 王梅怀疑刘宁。/?<br>/uaŋ35 mei35 xuai35 i35 liou35 niəŋ35/<br>(Wang Mei suspects Liu Ning.)                                                                    |  | 罗婷明年学轮滑。/?<br>/luo35 tʰiəŋ35 miəŋ35 nien35 ɤye35 luən35<br>xua35/<br>(Luo Ting will learn skating next year./?) |
|                 | 李敏反感刘雨。/?<br>/li214 miən214 fan214 kan214 liou35<br>y214/<br>(Li Min is disgusted with Liu Yu)                                                          |  | 李伟五点买雨伞。/?<br>/li214 uei214 u214 tien214 mai214 y214<br>san214/<br>(Li Wei buys an umbrella at 5 o'clock./?)    |
|                 | 叶亮害怕赵丽。/?<br>/iɛ51 liɑŋ51 xai51 pʰa51 tɕau51 li51/<br>(Ye Liang is afraid of Zhang Li./?)                                                               |  | 赵志半夜看电视。/?<br>/tɕau51 tɕʰi51 pan51 ie51 kʰan51 tien51 ɕʰi51/<br>(Zhao Zhi watches TV at midnight./?)            |
|                 | 李刚讨厌吕梦。/?<br>/li214 kaŋ55 tʰau214 iən51 ly214 mənɣ51/<br>(Li Gang hates Lü Meng./?)                                                                     |  | 李刚九号交水费。/?<br>/li214 kaŋ55 tɕiəu214 xau51 tɕiəu55 ɕuei214<br>fei51/<br>(Li Gang pays water fee on ninth./?)     |
| 10<br>syllables | 张薇担心肖英开车发晕。/? /tɕaŋ55 uei55 tan55 eiən55 eiəu55 iəŋ55 kʰai55 tɕʰə55 fa55 yən55/<br>(Zhang Wei worries about Xiao Ying having a carsickness./?)          |  |                                                                                                                 |
|                 | 王梅怀疑刘宁划船着迷。/? /uaŋ35 mei35 xuai35 i35 liou35 niəŋ35 xua35 tɕʰuan35 tɕau35 mi35/<br>(Wang Mei suspects Liu Ning of indulging in boating./?)              |  |                                                                                                                 |
|                 | 李敏反感刘雨点火取暖。/? /li214 miən214 fan214 kan214 liou35 y214 tien214 xuo214 tɕʰy214<br>nuan214/ (Li Min is disgusted with Liu Yu making a fire for warmth./?) |  |                                                                                                                 |
|                 | 叶亮害怕赵丽睡觉做梦。/? /iɛ51 liɑŋ51 xai51 pʰa51 tɕau51 li51 ɕuei51 tɕiəu51 tsuo51 mənɣ51/<br>(Ye Liang is afraid of Zhang Li dreaming when sleeping./?)          |  |                                                                                                                 |
|                 | 李刚讨厌吕梦讲课紧张。/? /li214 kaŋ55 tʰau214 iən51 ly214 mənɣ51 tɕiəŋ214 kʰə51 tɕiən214 tɕaŋ55/<br>(Li Gang hates Lü Meng to be nervous when teaching./?)         |  |                                                                                                                 |
