# Supplementary material
Source: publisher figshare collection journal article supplement (https://asha.figshare.com/articles/dataset/_/19302275)

**Supplemental Material S14.** The relationship between the acoustic cues and whispered tone identification.

(a) The relationship between the acoustic cues and whispered T2 and T1 identification.

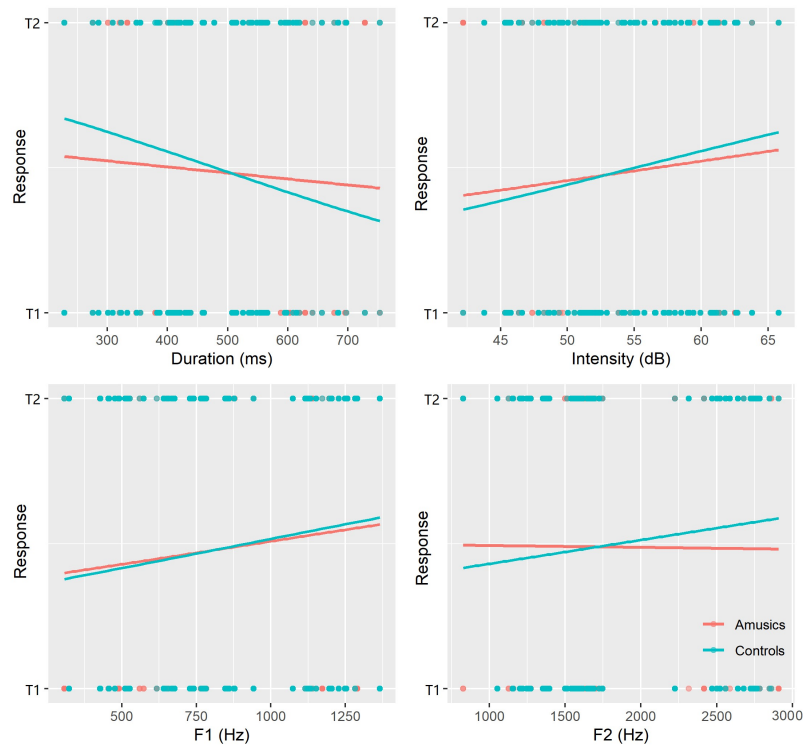

(b) The relationship between the acoustic cues and whispered T3 and T1 identification.

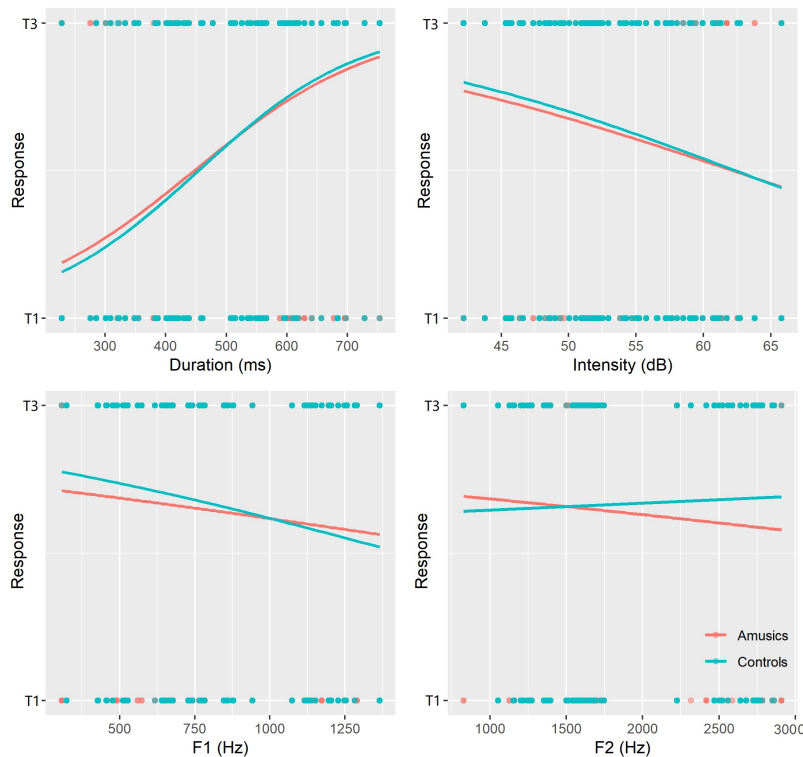

(c) The relationship between the acoustic cues and whispered T4 and T1 identification.

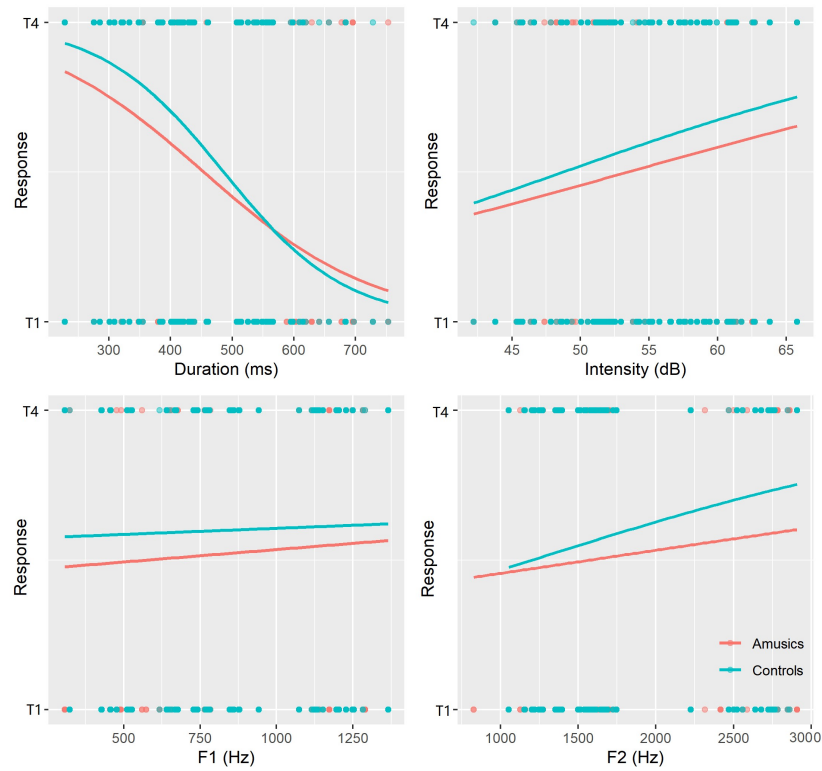

(d) The relationship between the acoustic cues and whispered T3 and T2 identification.

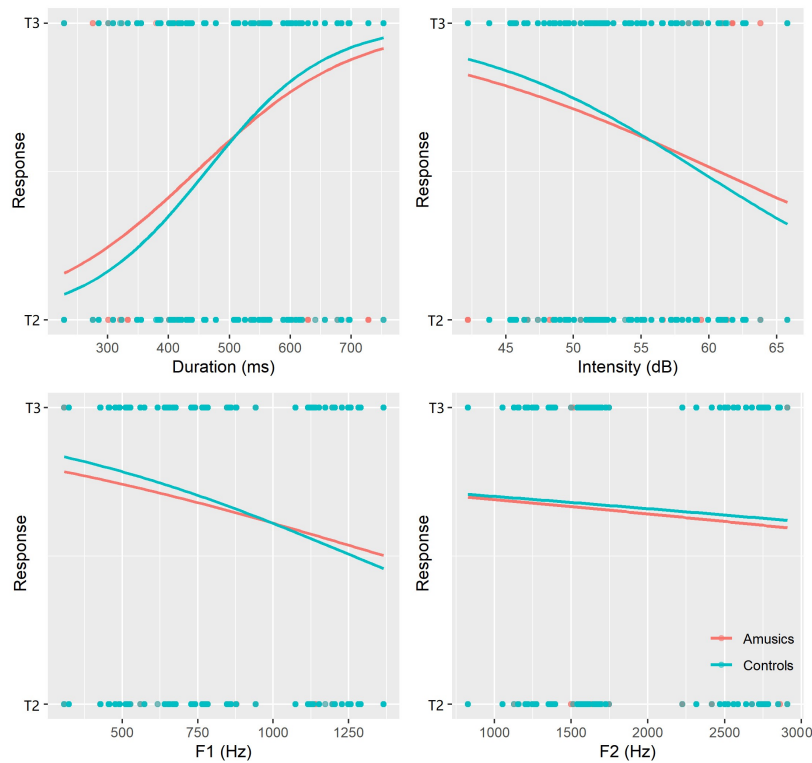

(e) The relationship between the acoustic cues and whispered T4 and T2 identification.

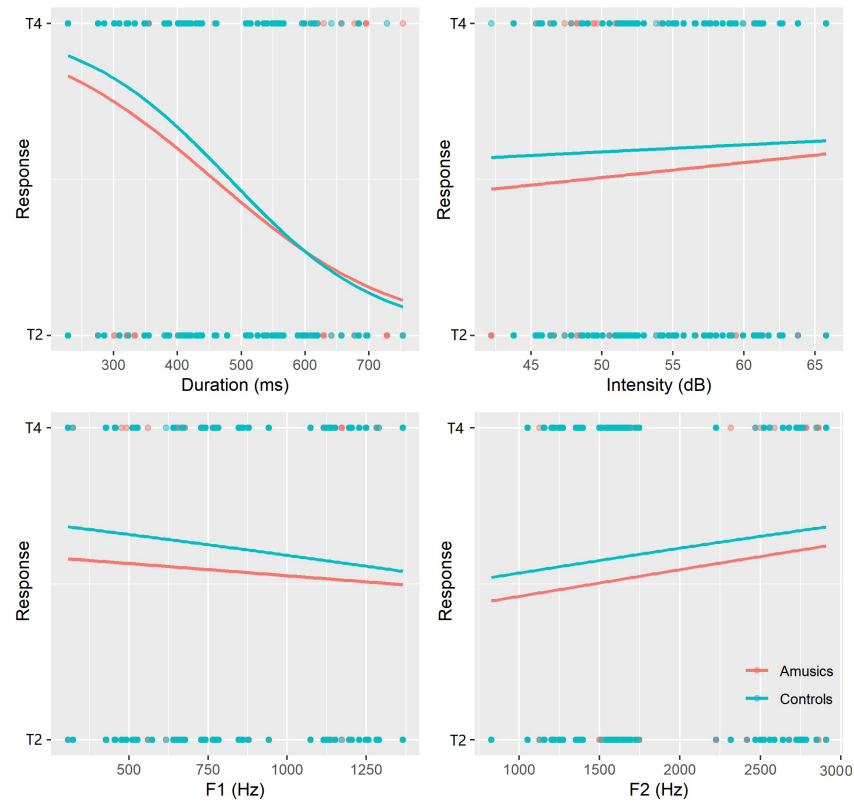

(f) The relationship between the acoustic cues and whispered T4 and T3 identification.

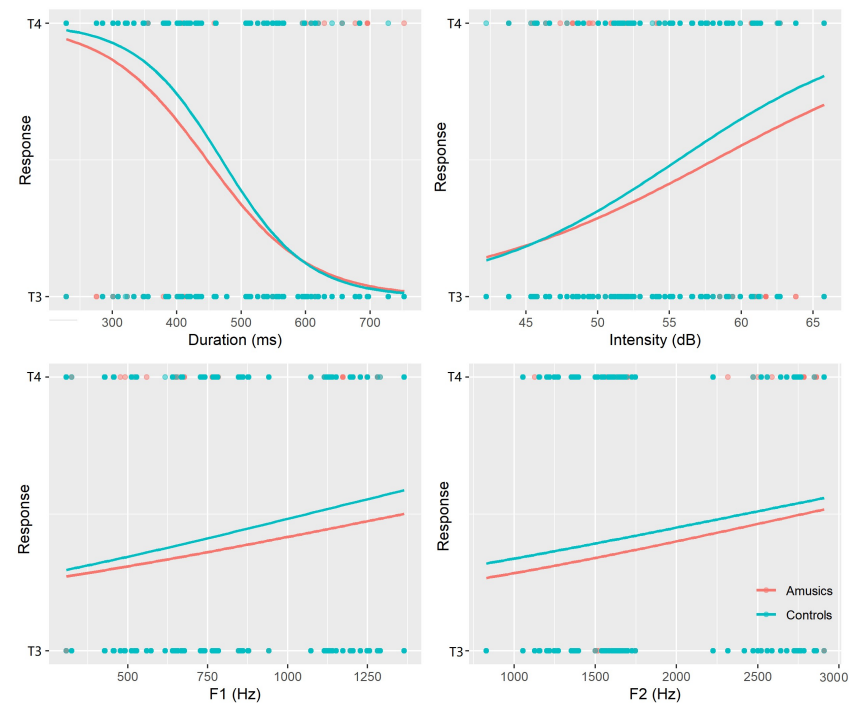

Supplement: Supplementary file 13 [file 1]
