# Supplementary material
Source: publisher figshare collection journal article supplement (https://asha.figshare.com/articles/dataset/_/19302275)
Supplement: Supplementary file 14 [file 1]

**Supplemental Material S6.** Results of correlations among the nine acoustic cues of the phonated sentences.

| Pearson Correlation/<br>items | S $f_0$<br>mean | S $f_0$<br>SD | S $f_0$<br>dir | S<br>duration | S<br>intensity | Fs $f_0$<br>mean | Fs $f_0$<br>SD | Fs<br>duration | Fs<br>intensity |
|-------------------------------|-----------------|---------------|----------------|---------------|----------------|------------------|----------------|----------------|-----------------|
| S $f_0$ mean                  | 1               | 0.52          | 0.21           | 0.06          | -0.2           | 0.84             | 0.25           | 0.18           | -0.002          |
| S $f_0$ SD                    |                 | 1             | -<br>0.03      | 0.008         | -0.23          | 0.32             | 0.61           | 0.18           | -0.03           |
| S $f_0$ dir                   |                 |               | 1              | -0.09         | 0.44           | 0.49             | -0.24          | 0.08           | 0.44            |
| S duration                    |                 |               |                | 1             | -0.29          | 0.04             | -0.04          | -0.05          | 0.34            |
| S intensity                   |                 |               |                |               | 1              | -0.002           | -0.19          | -0.19          | 0.83            |
| Fs $f_0$ mean                 |                 |               |                |               |                | 1                | 0.02           | 0.007          | 0.17            |
| Fs $f_0$ SD                   |                 |               |                |               |                |                  | 1              | 0.15           | 0.14            |
| Fs duration                   |                 |               |                |               |                |                  |                | 1              | 0.12            |
| Fs intensity                  |                 |               |                |               |                |                  |                |                | 1               |

*Note.* S = sentence (e.g., “S  $f_0$  mean” signifies the mean  $f_0$  of the whole sentences); Fs = final syllable (e.g., “FS  $f_0$  mean” signifies the mean  $f_0$  of the final syllable).
